# Supplementary material for: A Comparative Study of Two Bone Graft Substitutes—InterOss® Collagen and OCS-B Collagen®
Source: MDPI journal article supplement (doi:10.3390/jfb13010028), 2022-03-09
Supplement: s1 [file s1]

## SUPPLEMENTARY INFORMATION

### SUPPLEMENTARY FIGURES

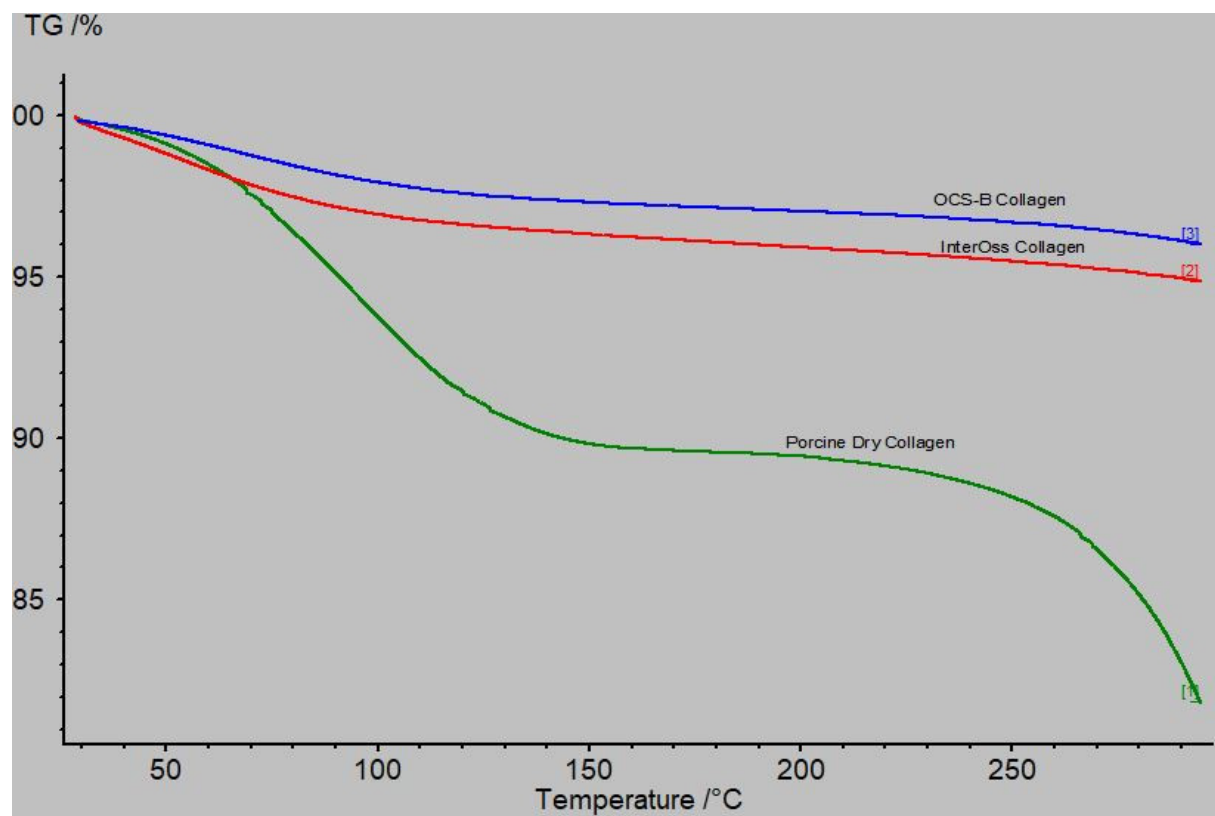

Figure S1 – A typical TG curve representing the percent mass change following the exposure to increasing temperature for InterOss Collagen, OCS-B Collagen and Porcine Dry Collagen.

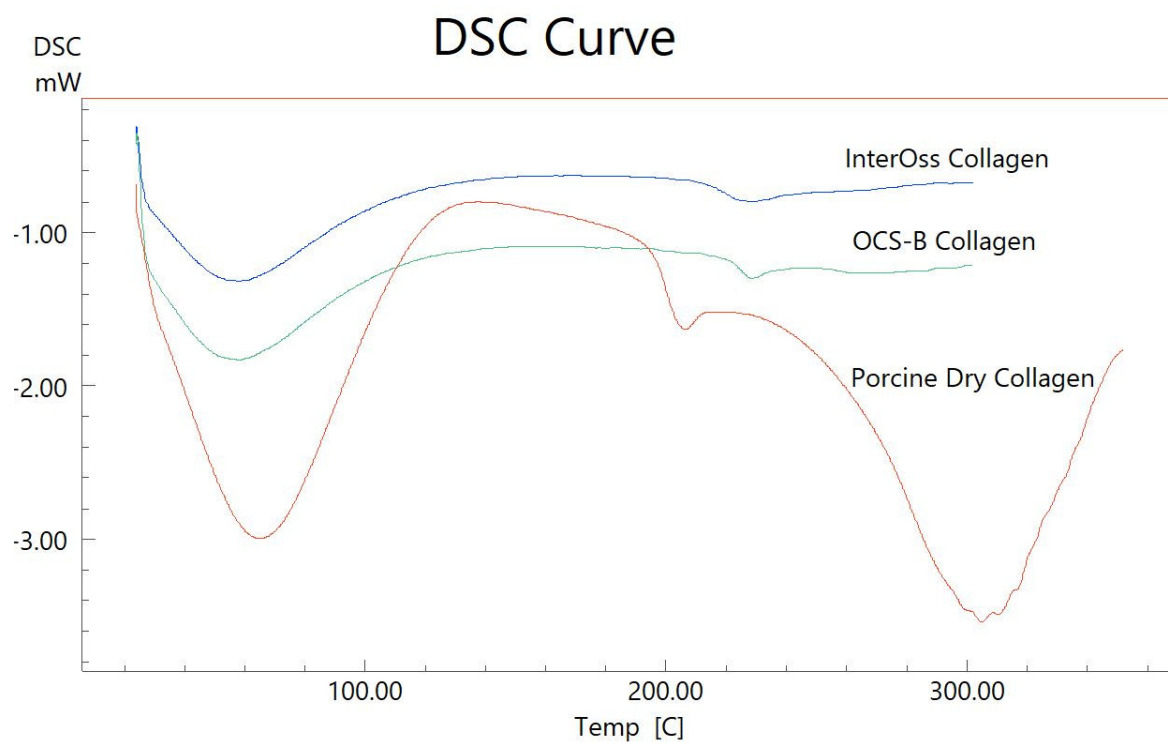

Figure S2 – A typical DSC curve representing heat flow characteristics for InterOss Collagen, OCS-B Collagen and Porcine Dry Collagen.
